# Supplementary material for: Rational synthesis of macroporous nanocarbon with phosphorus-doping from pitch for high-rate sodium ion batteries
Source: Royal Society of Chemistry journal article supplement (doi:10.1039/d4nj00178h), 2024-01-01
Supplement: d4nj00178h1.pdf [file d4nj00178h1.pdf]

Rational synthesis of macroporous nanocarbon with phosphorus-doping from pitch  
for high-rate sodium ion batteries

Ying-Mei Li<sup>1</sup>, Shu-Feng Liu<sup>1</sup>, Wei Sun<sup>1</sup>, Ruifang Lu<sup>2,3,\*</sup>, Chan Liu<sup>2</sup>, Qiang Sun<sup>1,\*</sup>

1-School of Metallurgy, Northeastern University, Shenyang 110819, P. R. China

2-State Key Laboratory of Vanadium and Titanium Resources Comprehensive  
Utilization, Pangang Group Research Institute Co. Ltd., Panzhihua 617000, P. R.

China

3-School of Chemistry and Chemical Engineering, Chongqing University, Chongqing,  
400044, P. R. China

\*Corresponding author. Tel: +86 024-83687750. E-mail: [sunq@smm.neu.edu.cn](mailto:sunq@smm.neu.edu.cn)

(Qiang Sun);

Tel: +86 0812-3380582. E-mail: [19982312680@163.com](mailto:19982312680@163.com) (Ruifang Lu)

## Theoretical calculations

To avoid the effect of SEI film formation on diffusion during the first charge-discharge cycle, all samples were subjected to one cycle at a current density of 20 mA g<sup>-1</sup> followed by an intermittent titration at a current density of 20 mA g<sup>-1</sup> for 30 min of pulsed charge-discharge with an intermediate rest period of 2 h. The sodium ion diffusion coefficient D was calculated as follows:

$$D = \frac{4}{\pi\tau} \left( \frac{m_g V_m}{M_B S} \right)^2 \left( \frac{\Delta E_s}{\Delta E_\tau} \right)^2$$

where  $\tau$  represents the pulse time interval;  $m_g$  represents the mass of active substance;

$M_B$  represents the molar mass;  $V_m$  represents the molar volume;  $S$  represents the contact area between electrode and electrolyte;  $L$  represents the thickness of electrode material;  $\Delta E_s$  represents the potential change during the time of applying constant current, and  $\Delta E_\tau$  is the change of steady-state potential.

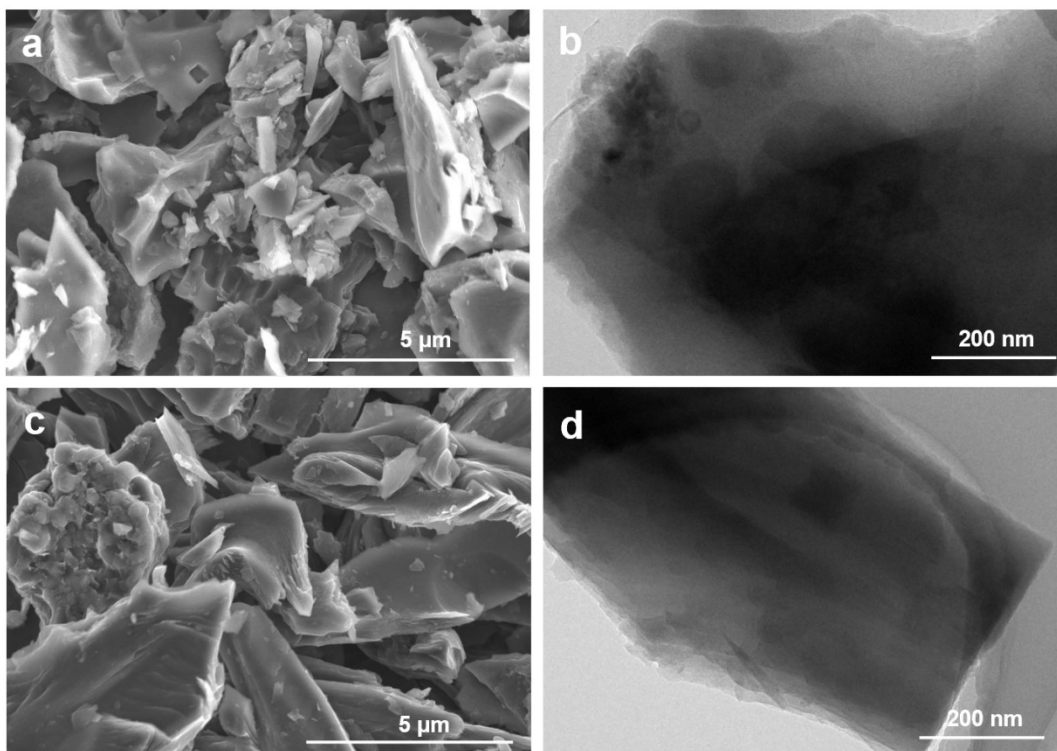

Fig. S1 SEM images of (a) C-3, (c) C-4 and TEM images of (b) C-3, (d) C-4

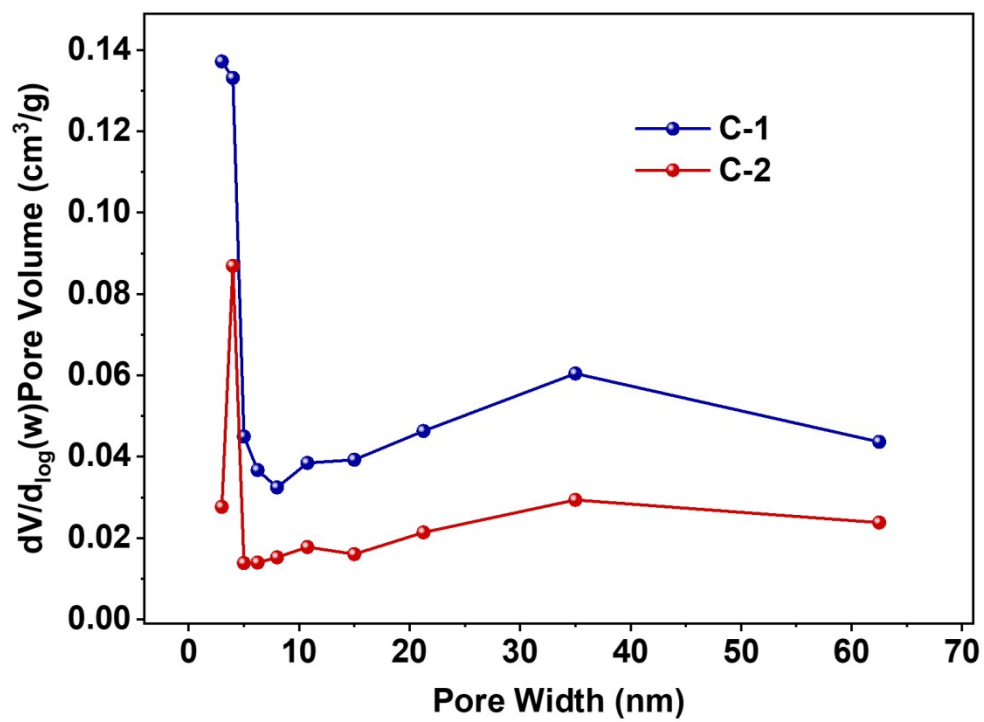

Fig. S2 BJH pore size distribution of C-1 and C-2

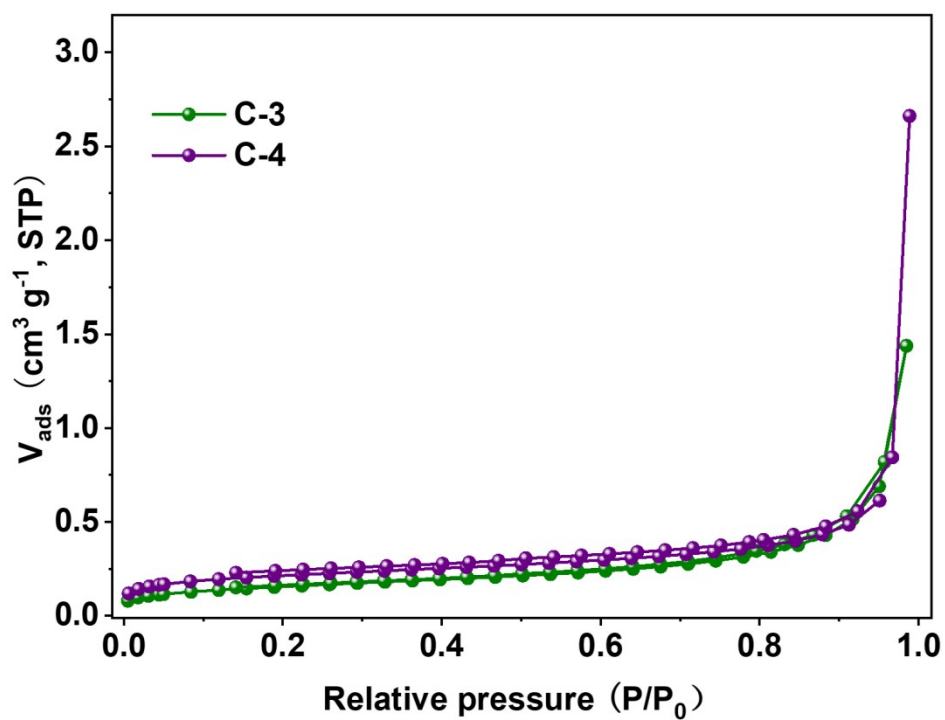

Fig.S3  $\text{N}_2$  adsorption-desorption isotherms of C-3 and C-4

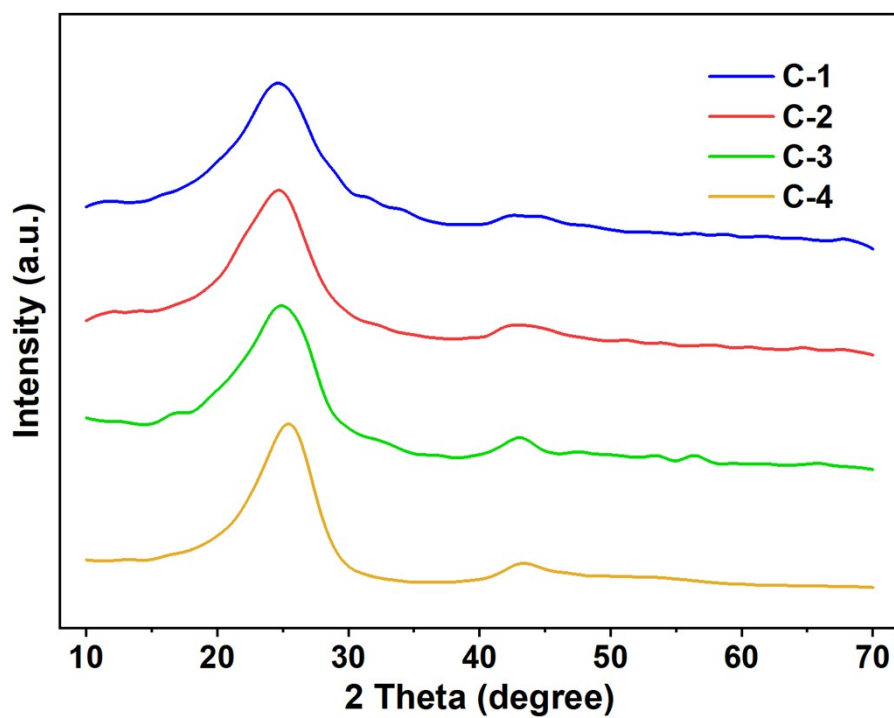

Fig.S4 XRD diffraction patterns of C-1, C-2, C-3 and C-4

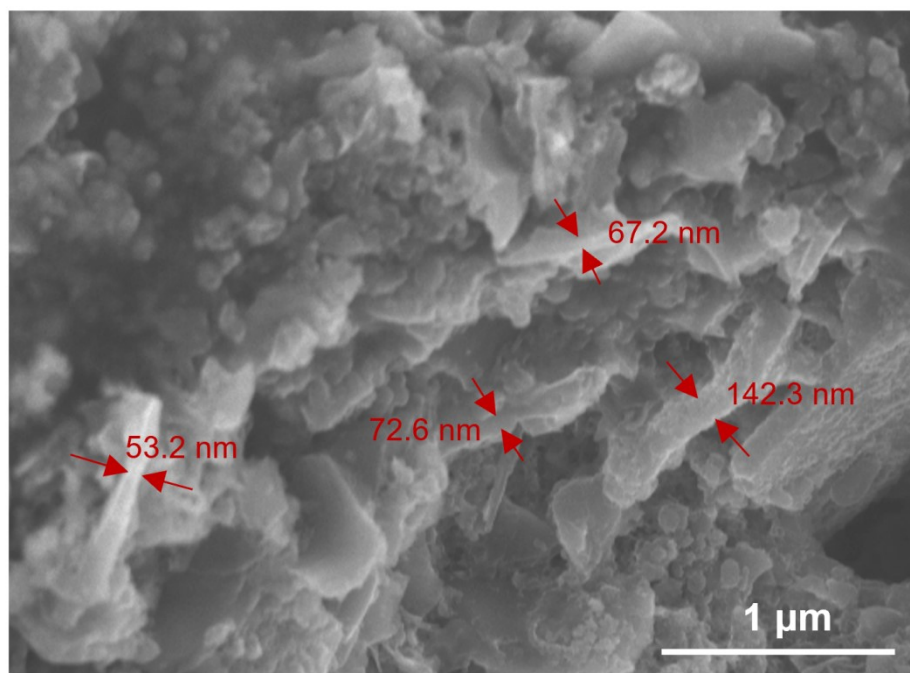

Fig. S5 SEM image of C-1 after cycles

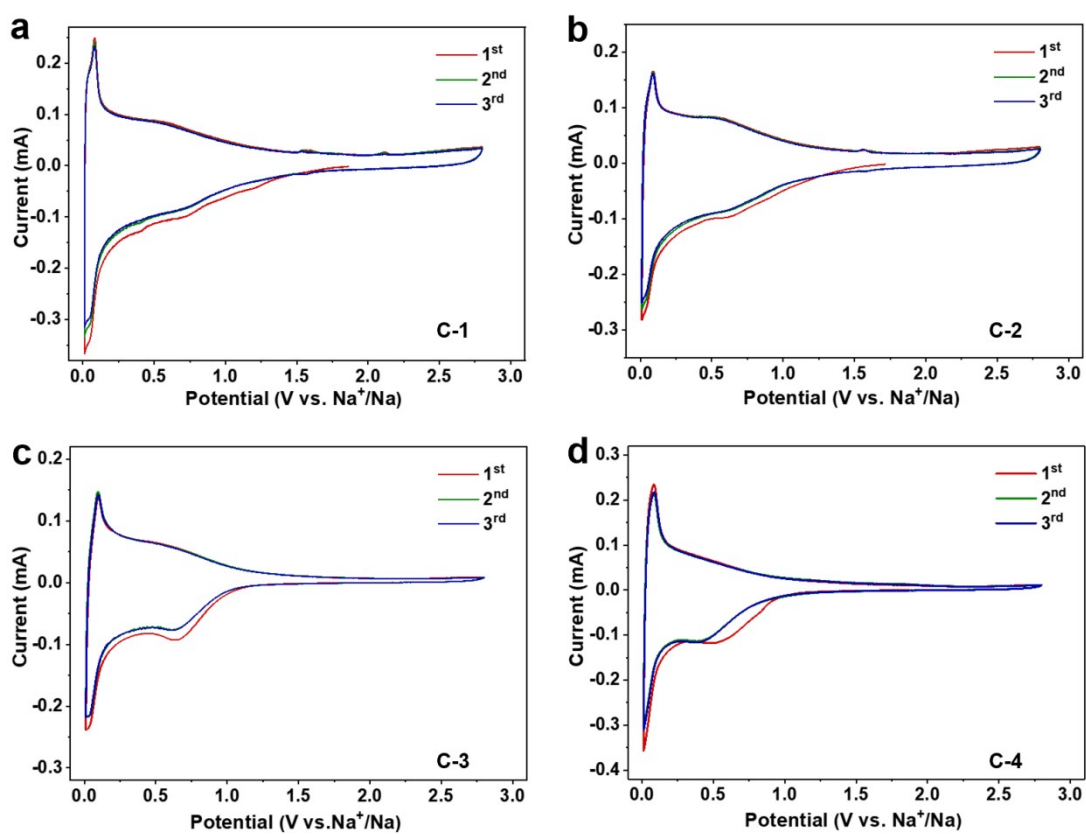

Fig. S6 CV curves of (a) C-1, (b) C-2, (c) C-3, (d) C-4 at 0.2 mV s<sup>-1</sup> scanning rate
